# Supplementary material for: Discrimination of Picea chihuahuana Martinez populations on the basis of climatic, edaphic, dendrometric, genetic and population traits
Source: PeerJ. 2017 Jun 12;5:e3452. doi: 10.7717/peerj.3452 (PMC5470581; doi:10.7717/peerj.3452)
Supplement: Supplemental Information 1 — Raw data of 74 variables (22 climatic variables, 27 edaphic variables, 10 dasometric variables, four density variables, two population variables, six genetic variables and three species diversity indices) from 14 Picea chihuahuana populations applied for data analyses and preparation of Table 2, 3, 4, 6, 7, Fig. 2, 3, 4 and 5. [file peerj-05-3452-s001.xlsx]

## Sheet: Hoja1
Pop	Sp	long	lat	elev	Mat	Map	Gsp	Mtcm	Mmin	Mtwm	Mmax	Sday	Fday	Ffp	Dd5	Gsdd5	D100	DD0	Mmindd0	Smrpb	Smrsprpb	Sprp	Smrp	Winp	EC	NO3	P	OM	%CaCO 3	%Sat	Sand	Silt	Clay	Den	pH	Ca	Mg	Na	K	Fe	Zn	Mn	Cu	%o.b.	%H	%Ca	%Mg	%K	%Na
TN	Picea chihuahuana	-107.77	27.9575	2380	10.9	797	558	4.3	-5	17.1	26.4	155	283	138	2369	1443	64	29	864	4.94	11.73	30	352	166	1.1	292.694	12.2229	8.56111	0	29	55.26	29.28	15.46	0.91	5.97	4932	504	97.5	1446	112.64	4.04	51.04	0.6	5.5	15.45	59.0869	10.0635	8.88387	1.01572
RC	Picea chihuahuana	-107.753	27.9556	2414	10.8	799	559	4.1	-5.2	16.9	26.2	156	281	136	2312	1392	66	33	884	4.88	11.73	30	352	167	1.27	139.325	36.216	8.56111	4.8	71	51.26	33.28	15.46	0.8	5.85	4716	444	74	1314	112.64	4.8	62.48	1.04	5.74	17.25	58.6322	9.20013	8.37767	0.800011
CV	Picea chihuahuana	-107.772	27.9503	2500	10.4	829	581	3.8	-5.4	16.5	25.8	156	280	135	2218	1336	69	39	907	4.93	11.87	31	368	172	0.45	77.2386	39.9885	3.35	0	54	57.26	25.28	17.46	1.07	5.79	3168	432	60	853.5	164.56	3.52	52.36	0.28	5.76	18.15	55.0618	12.514	7.60736	0.906815
TY	Picea chihuahuana	-107.817	27.9175	2355	11.2	819	572	4.6	-4.7	17.2	26.6	154	286	143	2428	1497	61	24	828	4.96	12.07	30	362	172	0.92	564.692	7.545	12.6556	0	85	63.26	25.28	11.46	0.74	5.98	4398	306	40	674.5	151.36	9.4	163.68	0.64	5.48	15.3	65.8784	7.63937	5.18125	0.521014
TR	Picea chihuahuana	-107.755	27.9075	2395	10.8	798	555	4.2	-5.1	16.9	26.2	155	282	135	2333	1417	65	31	875	4.78	11.57	30	347	169	0.55	215.455	6.9414	8.93333	0	75	67.26	19.28	13.46	0.79	5.95	4902	432	77	2055	63.36	3.84	69.96	0.38	5.54	15.75	57.222	8.4047	12.3017	0.781596
VN	Picea chihuahuana	-107.692	27.7614	2311	10.9	763	520	4.3	-4.8	17.1	26.3	154	282	134	2362	1448	64	29	862	4.31	10.53	30	316	169	0.72	153.738	16.1765	3.72222	0.52	53	61.26	25.28	13.46	1.03	5.64	3912	366	93	664	54.12	0.52	57.2	0.2	6.06	20.4	58.1967	9.07464	5.06562	1.20305
LQ	Picea chihuahuana	-106.364	26.4703	2730	10.2	700	550	4.4	-5.6	14.9	24.3	156	266	104	2069	1031	59	24	898	4.34	12.07	27	326	100	1.21	264.607	114.684	8.56111	2.76	65	61.26	29.28	9.46	0.93	5.9	5238	942	97	2385	231	2.76	266.2	0.28	5.64	16.5	50.2538	15.0627	11.7343	0.809239
PPR	Picea chihuahuana	-106.405	26.1542	2600	10.4	746	578	5.1	-5	14.7	24.2	158	268	107	2128	1025	52	15	853	4.35	13.23	26	344	115	2.19	174.803	79.977	7.07222	7.8	63	67.26	23.28	9.46	0.96	5.92	4386	366	177.5	3318	161.04	7.8	91.96	0.24	5.6	16.2	50.057	6.96188	19.4195	1.76156
QD	Picea chihuahuana	-106.381	26.1467	2570	10.7	740	574	5.3	-4.9	15	24.5	154	271	115	2196	1125	50	14	833	4.36	13.12	26	341	113	0.88	181.086	36.6687	5.21111	0	48	59.26	27.28	13.46	0.99	7.22	4884	300	86.5	2475	31.28	3.04	18.84	0.16	4.22	0	69.5241	7.11754	18.0676	1.07073
CB	Picea chihuahuana	-106.441	25.0986	2450	11.2	1350	898	6.3	-2	15.7	23.9	140	295	163	2384	1521	43	4	531	4.38	12.65	43	544	326	0.5	190.325	0	16.75	0	78	75.26	17.28	7.46	0.77	5.31	2340	204	46.5	191	158.84	0.32	63.8	0.84	6.81	25.35	56.3251	8.18398	2.35768	0.973287
SJ	Picea chihuahuana	-105.799	24.0186	2480	10.4	1261	931	5.3	-3.7	14.6	23	157	284	140	2108	1172	55	13	780	3.98	13.47	40	539	232	0.41	128.977	6.88104	14.5167	0	65	75.26	15.28	9.46	0.94	4.8	2778	360	67	723.5	313.72	12.24	181.72	0.46	7.09	33	43.7135	9.44137	5.83832	0.916771
SB	Picea chihuahuana	-105.439	23.6622	2725	9.7	1294	941	5	-3.7	13.8	21.7	163	278	123	1873	974	59	19	807	3.83	12.64	42	531	251	0.55	24.0216	11.6193	17.4944	12.56	92	69.26	21.28	9.46	0.71	5.4	6090	462	57	6225	169.84	12.56	142.12	0.38	6.54	24	41.8746	5.29448	21.9502	0.340808
ACH	Picea chihuahuana	-104.718	23.3514	2600	11.9	981	772	7.3	-1.3	15.8	23.8	126	295	165	2593	1679	35	0	427	4.08	14.48	31	449	139	0.24	14.7825	9.5067	4.09444	0.36	65	61.26	29.28	9.46	1.07	5.84	2910	144	51.5	346.5	122.32	0.36	16.64	0.22	5.76	17.4	66.3028	5.46827	4.04862	1.02035
LP	Picea chihuahuana	-104.75	23.3311	2685	11.5	1019	799	6.9	-1.7	15.3	23.3	132	290	157	2441	1506	38	1	483	4.03	14.03	33	463	146	0.46	92.7602	0	11.1667	0.48	90	75.26	15.28	9.46	0.7	5.68	3414	258	61	1089.5	152.68	0.48	56.76	0.6	5.48	19.8	57.2504	7.2108	9.36931	0.889502
[truncated: 27 more columns]
